# Supplementary material
Source: MDPI journal article supplement (https://www.mdpi.com/2071-1050/9/10/1772)
Supplement: s1 [file s1]

# Supplementary Materials: The environmental mitigation potential of photovoltaic-powered irrigation in the production of South African maize

Sarah Wettstein<sup>1</sup>, Karen Muir <sup>1\*</sup>, Deborah Scharfy<sup>1</sup>, Matthias Stucki<sup>1</sup>

<sup>1</sup> Zurich University of Applied Sciences, Institute of Natural Resource Sciences, 8820 Wädenswil, Switzerland; [sarah.wettstein@zhaw.ch](mailto:sarah.wettstein@zhaw.ch); [karen.muirwendel@zhaw.ch](mailto:karen.muirwendel@zhaw.ch); [d.scharfy@gmx.de](mailto:d.scharfy@gmx.de); [matthias.stucki@zhaw.ch](mailto:matthias.stucki@zhaw.ch)

\* Correspondence: [karen.muirwendel@zhaw.ch](mailto:karen.muirwendel@zhaw.ch); Tel.: +41 58 934 54 56

## 1 Maize Production Inputs

### 1.1 Pesticides

The active ingredients of pesticides used in the production of South African rainfed and irrigated maize can be seen in Table S 1. “Pesticides, unspecified” refers to active ingredients not included in the ecoinvent database.

Table S 1: Active ingredients [g/ha] in pesticides used in rainfed and irrigated maize production in South Africa [1–3].

| Pesticide                    | Active ingredient         | Quantity applied [g/ha] |                  |
|------------------------------|---------------------------|-------------------------|------------------|
|                              |                           | Maize, rainfed          | Maize, irrigated |
| Organophosphorous-compounds  | glyphosate-isopropylamine | 180                     | 0                |
| Acetamide-anillide-compounds | s-metolachlor             | 1 673                   | 305              |
| Triazine-compounds           | atrazine                  | 653.8                   | 50               |
|                              | therbuthylazine           | 504.9                   | 50               |
| Cyclic N-compounds           | difenoconazole            | 20.8                    | 16.7             |
|                              | flusilazole               | 0                       | 83.3             |
| Pyrethroid-compounds         | lambda-cyhalothrin        | 3.5                     | 9.3              |
|                              | alpha-cypermethrin        | 20                      | 10               |
| Phenoxy-compounds            | fenvalerate               | 6.7                     | 6.7              |
|                              | carbendazim               | 0                       | 41.7             |
| Pesticides, unspecified      | azoxystrobine             | 251.3                   | 26.7             |
|                              | benfuracarb               | 66.7                    | 66.7             |
|                              | ammonium sulphate         | 346.7                   | 0                |
|                              | imidacloprid              | 0.6                     | 0.6              |
|                              | mesotrione                | 18.8                    | 0.1              |
|                              | tiamethoxam               | 443.5                   | 11.5             |

## 1.2 Fertilisers

Table S 2 shows the quantity of organic and mineral fertilisers used in South African maize production and the total mass of nutrients applied.

*Table S 2: Fertilisers and nutrients applied [kg/ha] in the production of rainfed and irrigated maize production in South Africa [1–3].*

| Fertiliser/Nutrient        | Quantity applied [kg/ha] |                  |
|----------------------------|--------------------------|------------------|
|                            | Maize, rainfed           | Maize, irrigated |
| <b>Cattle manure</b>       | 2 500                    | 2 500            |
| <b>N</b>                   | 27.5                     | 27.5             |
| <b>P</b>                   | 10                       | 10               |
| <b>K</b>                   | 25                       | 25               |
| <b>Mineral Fertilisers</b> |                          |                  |
| <b>Lime</b>                | 889                      | 1 000            |
| <b>N</b>                   | 65.6                     | 202              |
| <b>P</b>                   | 11.1                     | 32.9             |
| <b>K</b>                   | 7                        | 45.5             |
| <b>Nutrients- Total</b>    |                          |                  |
| <b>N</b>                   | 93.1                     | 229.5            |
| <b>P</b>                   | 21.1                     | 42.9             |
| <b>K</b>                   | 32                       | 70.5             |

## 1.3 Transport

Transport distances and the origin of inputs and equipment included in this study are shown in Table S 3.

*Table S 3: Transport distances [km] and origin of transported products.*

| Material                   | Vehicle             | From... to...                | Distance [km]       |
|----------------------------|---------------------|------------------------------|---------------------|
| <b>Harvested maize</b>     | Tractor and trailer | Field to farm                | 5.0 <sup>+</sup>    |
|                            | Tractor and trailer | Farm to silo                 | 40 <sup>+</sup>     |
| <b>Fertilisers</b>         | Tractor and trailer | Retailer to farm             | 650 <sup>+</sup>    |
| <b>Pesticides</b>          | Tractor and trailer | Retailer to farm             | 650 <sup>+</sup>    |
| <b>Tractor and trailer</b> | Lorry               | Within country of production | 1 687 <sup>+</sup>  |
|                            | Transoceanic ship   | Export country to Durban     | 14 401 <sup>*</sup> |
|                            | Lorry               | Durban to production region  | 650 <sup>+</sup>    |
|                            | Freight train       | Durban to production region  | 650 <sup>+</sup>    |

+ [4], † [5], \* [6]

## 1.4 Irrigation

A dataset for a centre pivot irrigation system in South Africa was created using country-specific electricity and water data (Table S 4).

Table S 4: Dataset for irrigation in South Africa with a centre pivot system.

| <b>Irrigation</b>                                                                                    | <b>Unit</b>    |       |
|------------------------------------------------------------------------------------------------------|----------------|-------|
| <b>Centre pivot irrigation, operation, per ha and year, maize, national average {ZA}  processing</b> | ha*a           |       |
| <b>Water, unspecified natural origin, ZA</b>                                                         | m <sup>3</sup> | 7 000 |
| <b>Electricity, low voltage {ZA}  market for</b>                                                     | kWh            | 1 840 |
| <b>Centre pivot irrigation, construction, per ha and year {ZA}  processing</b>                       | ha*a           |       |
| <b>Steel, unalloyed {GLO}  market for</b>                                                            | kg             | 13    |
| <b>Metal working, average for steel product manufacturing {RoW}  processing</b>                      | kg             | 13    |
| <b>Zinc coat, coils {RoW}  zinc coating, coils</b>                                                   | m <sup>2</sup> | 0.667 |

The sources of data used to calculate average water consumption for irrigated maize production in South Africa are shown in Table S 5.

Table S 5: Water consumption for irrigation in South Africa [m<sup>3</sup>/ha/a].

| <b>Source</b>                    | <b>Water consumption [m<sup>3</sup>/ha/a]</b> |
|----------------------------------|-----------------------------------------------|
| <b>Maize producer [7]</b>        | 6 100                                         |
| <b>Grain SA [1–3]</b>            | 8 000                                         |
| <b>GWK [8]</b>                   | 6 900                                         |
| <b>Average water consumption</b> | <b>7 000</b>                                  |

## 2 Emissions Arising from Maize Production

### 2.1 Ammonia

Table S 6 shows the quantity of fertiliser applied and the ammonia emissions associated with the production of South African maize.

*Table S 6: Fertiliser application and ammonia emissions [kg/ha] associated with the production of South African rainfed and irrigated maize [1–3,8].*

| Quantity<br>[kg/ha] | Grain maize,<br>rainfed | Grain maize,<br>irrigated |
|---------------------|-------------------------|---------------------------|
| Cattle manure       | 2 500                   | 2 500                     |
| NPK fertiliser      | 65.6                    | 202                       |
| Ammonia emissions   | 8.5                     | 25                        |

### 2.2 Dinitrogen Monoxide

Table S 7 gives an overview of the parameters used in the calculation of the dinitrogen monoxide emissions arising from maize production in South Africa.

*Table S 7: Nitrogen inputs, removals, and dinitrogen monoxide emissions associated with the production of South African rainfed and irrigated maize [9].*

| Parameter                  | Unit  | Grain maize,<br>rainfed | Grain maize,<br>irrigated |
|----------------------------|-------|-------------------------|---------------------------|
| N from fertiliser input    | kg N  | 77.9                    | 214.5                     |
| N in C-N-pool              | kg N  | 21.2                    | 27                        |
| Atmospheric deposition     | kg N  | 25                      | 25                        |
| N fixation                 | kg N  | 0                       | 0                         |
| N immobilisation           | %     | 0                       | 0                         |
| N <sub>2</sub> O emissions | kg/ha | 1.9                     | 4.7                       |

### 2.3 Nitrate

The nitrate emissions occurring as a result of maize production in South Africa are shown in Table S 8.

*Table S 8: Nitrogen inputs, losses, and nitrate emissions associated with the production of South African rainfed and irrigated maize [9].*

| Parameter<br>[kg/ha]             | Grain maize,<br>rainfed | Grain maize,<br>irrigated |
|----------------------------------|-------------------------|---------------------------|
| N in ammonia                     | 7                       | 20.6                      |
| N in above ground plant residues | 9.2                     | 14.1                      |
| N in below ground plant residues | 1.7                     | 2.6                       |
| Leaching                         | 0.3                     | 0.3                       |
| NO <sub>3</sub> emissions        | 134.1                   | 285                       |

## 2.4 Nitrous Oxide

The NO<sub>x</sub> emissions arising from the production of South African dryland and irrigated maize are shown in Table S 9.

Table S 9: Dinitrogen oxide and nitrogen oxide emissions arising from South African rainfed and irrigated maize production [9].

| Emissions [kg/ha]     | Grain maize,<br>rainfed | Grain maize,<br>irrigated |
|-----------------------|-------------------------|---------------------------|
| <b>N<sub>2</sub>O</b> | 1.9                     | 4.7                       |
| <b>NO<sub>x</sub></b> | <b>0.4</b>              | <b>1</b>                  |

## 2.5 Phosphate and Phosphorus

The phosphate emissions to groundwater through leaching associated with the production of South African maize are shown in Table S 10.

Table S 10: Phosphate leaching to groundwater [kg/ha/a] associated with the production of South African rainfed and irrigated maize.

| Parameter                           | Unit    | Grain maize,<br>rainfed | Grain maize,<br>irrigated |
|-------------------------------------|---------|-------------------------|---------------------------|
| <b>P<sub>gw</sub></b> <sup>†</sup>  | kg/ha/a | 0.07                    | 0.07                      |
| <b>F<sub>gw</sub></b>               | -       | 1                       | 1                         |
| <b>P<sub>2</sub>O<sub>5</sub>sl</b> | kg/ha   | 0                       | 0                         |
| <b>P<sub>gw</sub></b>               | kg/ha/a | <b>0.07</b>             | <b>0.07</b>               |

<sup>†</sup> Average value for arable land [10].

Phosphate runoff to surface waters for South African maize production is shown in Table S 11.

Table S 11: Phosphate run-off to surface water [kg/ha/a] associated with the production of South African rainfed and irrigated maize.

| Parameter                                      | Unit    | Grain maize,<br>rainfed | Grain maize,<br>irrigated |
|------------------------------------------------|---------|-------------------------|---------------------------|
| P-Fertilisation                                | kg/ha   | 11.1                    | 32.9                      |
| P <sub>rol</sub> <sup>*</sup>                  | kg/ha/a | 0.175                   | 0.175                     |
| F <sub>ro</sub>                                | -       | 1.08                    | 1.13                      |
| P <sub>2</sub> O <sub>5</sub> min <sup>†</sup> | kg/ha   | 11.1                    | 32.9                      |
| P <sub>2</sub> O <sub>5</sub> sl               | kg/ha   | 0                       | 0                         |
| P <sub>2</sub> O <sub>5</sub> man <sup>†</sup> | kg/ha   | 10                      | 10                        |
| P <sub>ro</sub>                                | kg/ha/a | <b>0.19</b>             | <b>0.2</b>                |

<sup>\*</sup> Average value for arable land [10], <sup>†</sup> Average values [11]

Phosphorous emissions to surface waters resulting from erosion in South Africa are shown in Table S 12.

Table S 12: Phosphorous emissions through erosion to surface water [kg/ha/a] associated with the production of South African rainfed and irrigated maize.

| Parameter                     | Unit         | Grain maize,<br>rainfed | Grain maize,<br>irrigated |
|-------------------------------|--------------|-------------------------|---------------------------|
| S <sub>er</sub> <sup>†</sup>  | kg/ha/a      | 2 200                   | 2 200                     |
| P <sub>cs</sub> <sup>*</sup>  | kg P/kg soil | 0.00095                 | 0.00095                   |
| F <sub>r</sub> <sup>+</sup>   | -            | 1.86                    | 1.86                      |
| F <sub>erw</sub> <sup>‡</sup> | -            | 0.05                    | 0.05                      |
| P <sub>er</sub>               | kg P/ha/a    | <b>0.78</b>             | <b>0.78</b>               |

<sup>†</sup> Average erosion rate for South Africa [12–14], <sup>\*</sup> Average value [10], <sup>+</sup> Average value [15], <sup>‡</sup> [10]

## 2.6 Heavy Metal Emissions

### 2.6.1 Heavy Metal Leaching into Groundwater

The leaching values was used to calculate the heavy metal emissions to groundwater can be seen in Table S 13.

Table S 13: Heavy metal leaching to groundwater [mg/ha/a] [16].

|                               | Cd | Cu    | Zn     | Pb  | Ni   | Cr     | Hg  |
|-------------------------------|----|-------|--------|-----|------|--------|-----|
| <b>Leaching<br/>[mg/ha/a]</b> | 50 | 3 600 | 33 000 | 600 | n.a. | 21 200 | 1.3 |

The heavy metal deposition values used in this study can be seen in Table S 14.

Table S 14: Heavy metal deposition [17].

|                                 | Cd  | Cu    | Zn     | Pb     | Ni    | Cr    | Hg |
|---------------------------------|-----|-------|--------|--------|-------|-------|----|
| <b>Deposition<br/>[mg/ha/a]</b> | 700 | 2 400 | 90 400 | 18 700 | 5 475 | 3 650 | 50 |

Table S 15 shows the heavy metals emissions to groundwater through leaching associated with maize production in South Africa.

Table S 15: Heavy metal emissions to ground water through leaching [mg/ha/a] associated with the production of South African rainfed and irrigated maize.

| Emissions into groundwater<br>[mg/ha/a] | Grain maize,<br>rainfed | Grain maize,<br>irrigated |
|-----------------------------------------|-------------------------|---------------------------|
| <b>Cd</b>                               | 24.9                    | 36.3                      |
| <b>Cu</b>                               | 2 615                   | 3 027                     |
| <b>Zn</b>                               | 6 910                   | 13 228                    |
| <b>Pb</b>                               | 109                     | 158                       |
| <b>Ni</b>                               | n. a.                   | n. a.                     |
| <b>Cr</b>                               | 20 934                  | 20 974                    |

The soil heavy metal contents used in this study can be seen in Table S 16.

Table S 16: Heavy metal contents of the soil [mg/kg soil] [18].

| Land use    | Soil heavy metal content [mg/kg soil] |      |      |      |    |      |       |
|-------------|---------------------------------------|------|------|------|----|------|-------|
|             | Cd                                    | Cu   | Zn   | Pb   | Ni | Cr   | Hg    |
| Arable land | 0.24                                  | 21.1 | 49.6 | 19.5 | 23 | 24.1 | 0.073 |

## 2.6.2 Heavy Metal Emissions into Surface Water through Erosion

Table S 17 shows the heavy metal emissions to surface water through erosion in South Africa.

Table S 17: Heavy metal emissions to surface water due to erosion [mg/ha/a] associated with the production of South African rainfed and irrigated maize.

| Emissions into surface water<br>[mg/ha/a] | Grain maize,<br>rainfed | Grain maize,<br>irrigated |
|-------------------------------------------|-------------------------|---------------------------|
| Cd                                        | 31                      | 46                        |
| Cu                                        | 5 827                   | 6 743                     |
| Zn                                        | 3 003                   | 5 749                     |
| Pb                                        | 927                     | 1 339                     |
| Ni                                        | 3 582                   | 3 954                     |
| Cr                                        | 5 455                   | 5 465                     |

## 2.6.3 Heavy Metal Emissions into Soil

The heavy metal emissions to agricultural soils associated with the production of maize in South Africa are shown in Table S 18.

Table S 18: Emissions of heavy metals to agricultural soil [m/ha/a] associated with the production of South African rainfed and irrigation maize.

| Emissions into agricultural soils<br>[mg/ha/a] | Grain maize,<br>rainfed | Grain maize,<br>irrigated |
|------------------------------------------------|-------------------------|---------------------------|
| Cd                                             | 665                     | 1 796                     |
| Cu                                             | 242                     | 4 456                     |
| Zn                                             | 21 865                  | 52 870                    |
| Pb                                             | 3 969                   | 6 277                     |
| Ni                                             | n. a.                   | n. a.                     |
| Cr                                             | 260 681                 | 312 841                   |

## 2.7 Water Scarcity

The monthly water scarcity index (WSI) and water scarcity for the six catchment areas corresponding to the main maize production areas in South Africa are shown in Table S 19.

Table S 19: Water scarcity index (WSI) [-] [19] and water scarcity [m<sup>3</sup>/ha/a] of the six catchment areas in the main maize production regions in South Africa. The WSI was multiplied by the volume of irrigation water per ha and year to calculate water scarcity. Months when irrigation occurs are shaded in dark grey; no maize cultivation takes places in August and September (font grey).

|         | Catchment area |                                       |         |                                       |         |                                       |         |                                       |         |                                       |         |                                       |
|---------|----------------|---------------------------------------|---------|---------------------------------------|---------|---------------------------------------|---------|---------------------------------------|---------|---------------------------------------|---------|---------------------------------------|
|         | 1              |                                       | 2       |                                       | 3       |                                       | 4       |                                       | 5       |                                       | 6       |                                       |
|         | WSI [-]        | Water scarcity [m <sup>3</sup> /ha/a] | WSI [-] | Water scarcity [m <sup>3</sup> /ha/a] | WSI [-] | Water scarcity [m <sup>3</sup> /ha/a] | WSI [-] | Water scarcity [m <sup>3</sup> /ha/a] | WSI [-] | Water scarcity [m <sup>3</sup> /ha/a] | WSI [-] | Water scarcity [m <sup>3</sup> /ha/a] |
| Jan     | 0.9974         | 1746                                  | 0.0109  | 19                                    | 0.0109  | 19                                    | 0.0137  | 24                                    | 0.0512  | 90                                    | 0.011   | 19                                    |
| Feb     | 0.011          |                                       | 0.0105  |                                       | 0.0108  |                                       | 0.0137  |                                       | 0.0197  |                                       | 0.0104  |                                       |
| Mar     | 0.0126         |                                       | 0.0108  |                                       | 0.0112  |                                       | 0.0137  |                                       | 0.0241  |                                       | 0.0107  |                                       |
| Apr     | 0.014          |                                       | 0.0113  |                                       | 0.0119  |                                       | 0.0137  |                                       | 0.0379  |                                       | 0.0109  |                                       |
| May     | 0.0167         |                                       | 0.0123  |                                       | 0.0135  |                                       | 0.0137  |                                       | 0.0578  |                                       | 0.0118  |                                       |
| Jun     | 0.0206         |                                       | 0.0134  |                                       | 0.0157  |                                       | 0.0137  |                                       | 0.1632  |                                       | 0.0126  |                                       |
| Jul     | 0.0356         |                                       | 0.0168  |                                       | 0.0217  |                                       | 0.0137  |                                       | 0.5836  |                                       | 0.0151  |                                       |
| Aug     | 0.1223         |                                       | 0.0274  |                                       | 0.0452  |                                       | 0.0137  |                                       | 0.9899  |                                       | 0.023   |                                       |
| Sep     | 0.6251         |                                       | 0.0642  |                                       | 0.085   |                                       | 0.0137  |                                       | 0.9999  |                                       | 0.0266  |                                       |
| Oct     | 0.9911         | 1734                                  | 0.2214  | 387                                   | 0.0387  | 68                                    | 0.0137  | 24                                    | 0.9999  | 1750                                  | 0.0439  | 77                                    |
| Nov     | 0.9994         | 1749                                  | 0.0548  | 96                                    | 0.0151  | 27                                    | 0.0137  | 24                                    | 1       | 1750                                  | 0.0315  | 55                                    |
| Dec     | 1              | 1750                                  | 0.0119  | 21                                    | 0.0115  | 20                                    | 0.0137  | 24                                    | 1       | 1750                                  | 0.0158  | 28                                    |
| Average | 0.4038         | 2827                                  | 0.0388  | 272                                   | 0.0142  | 170                                   | 0.0137  | 95.56                                 | 0.4954  | 3468                                  | 0.0186  | 130                                   |
| Total   |                | 6979                                  |         | 523                                   |         | 133                                   |         | 96                                    |         | 5340                                  |         | 179                                   |



### 3 Discussion

#### 3.1 Maize Production Area

The total maize production area, the proportion under irrigation, and the total area of irrigated maize production can be seen in Table S 20.

*Table S 20: Production area, proportion of maize production under irrigation, and area of irrigated maize production in South Africa in the production year 2015/16 [20,21].*

|                                                    | White maize | Yellow maize | Total      |
|----------------------------------------------------|-------------|--------------|------------|
| <b>Production area 2015/16 [1000 ha/a]</b>         | 1 015       | 932          | 1 947      |
| <b>Proportion under irrigation [%]</b>             | 8.1%        | 17.0%        |            |
| <b>Irrigated production area 2015/16 [1000 ha]</b> | 82          | 158          | <b>241</b> |

#### 3.2 Photovoltaic Module

Photovoltaic electricity production for solar powered irrigation in South Africa was modelled based on the 570 kW<sub>p</sub> open ground multi-crystalline silicon power plant in the ecoinvent database v3.3 [22]. Table S 21 below shows the monthly yield of this type of system with a nominal power of 1.0 kW for the city of Welkom (Free State, South Africa), located at 28°0'16" south, 26°46'23" east, with an elevation of 1339 m a.s.l. A fixed system with optimal orientation was assumed and combined PV system losses were assumed to be 26.3% [23].

*Table S 21: Photovoltaic yield for the city of Welkom, South Africa for a fixed optimal system with an inclination of 31° and an orientation of 177° [23].*

| Month                 | Average daily electricity production from the given system [kWh] | Average monthly electricity production from the given system [kWh] | Average daily sum of global irradiation per square meter received by the modules of the given system [kWh/m <sup>2</sup> ] | Average sum of global irradiation per square meter received by the modules of the given system [kWh/m <sup>2</sup> ] |
|-----------------------|------------------------------------------------------------------|--------------------------------------------------------------------|----------------------------------------------------------------------------------------------------------------------------|----------------------------------------------------------------------------------------------------------------------|
| January               | 4.48                                                             | 139                                                                | 6.31                                                                                                                       | 196                                                                                                                  |
| February              | 4.81                                                             | 135                                                                | 6.77                                                                                                                       | 189                                                                                                                  |
| March                 | 5.07                                                             | 157                                                                | 7.06                                                                                                                       | 219                                                                                                                  |
| April                 | 4.7                                                              | 141                                                                | 6.34                                                                                                                       | 190                                                                                                                  |
| May                   | 4.66                                                             | 144                                                                | 6.16                                                                                                                       | 191                                                                                                                  |
| June                  | 4.65                                                             | 139                                                                | 5.96                                                                                                                       | 179                                                                                                                  |
| July                  | 4.91                                                             | 152                                                                | 6.34                                                                                                                       | 196                                                                                                                  |
| August                | 5.14                                                             | 159                                                                | 6.82                                                                                                                       | 211                                                                                                                  |
| September             | 5.26                                                             | 158                                                                | 7.18                                                                                                                       | 215                                                                                                                  |
| October               | 4.95                                                             | 154                                                                | 6.93                                                                                                                       | 215                                                                                                                  |
| November              | 4.77                                                             | 143                                                                | 6.68                                                                                                                       | 200                                                                                                                  |
| December              | 4.51                                                             | 140                                                                | 6.34                                                                                                                       | 197                                                                                                                  |
| <b>Yearly average</b> | <b>4.82</b>                                                      | <b>147</b>                                                         | <b>6.57</b>                                                                                                                | <b>200</b>                                                                                                           |
| <b>Yearly total</b>   | <b>1760</b>                                                      |                                                                    | <b>2400</b>                                                                                                                |                                                                                                                      |

In compliance with the recommendations in the methodology guidelines for LCA of the IEA Photovoltaic Power Systems Program [24], a module lifetime of 30 years, with a degradation of 0.7% per year, corresponding to an average decrease in annual yield of 10.5% for a lifetime of 30 years, were

assumed. An area of  $7.366 \text{ m}^2/\text{kW}_p$  is needed for a photovoltaic power plant with a nominal power of  $1 \text{ kW}_p$  for this type of module with 13.5% efficiency [25]. Table S 22 shows the parameters necessary for the calculation of the photovoltaic module area necessary for the generation of electricity for the irrigation of one hectare of maize.

*Table S 22: Parameters needed for the calculation of photovoltaic module area requirements.*

|                                                                          | Utilisation of annual electricity production, including degradation | Utilisation of electricity production from October-January, including degradation |
|--------------------------------------------------------------------------|---------------------------------------------------------------------|-----------------------------------------------------------------------------------|
| Total annual electricity production [kWh/kWp]                            | 1760                                                                | 1760                                                                              |
| Electricity production, October-January [kWh/kWp]                        | 576                                                                 | 576                                                                               |
| Degradation [%]                                                          | 10.5                                                                | 10.5                                                                              |
| Annual yield, including degradation [kWh/kWp]                            | 1575                                                                | 1575                                                                              |
| Electricity production, October-January, including degradation [kWh/kWp] | 516                                                                 | 516                                                                               |
| Volume of water used for irrigation [m <sup>3</sup> /a]                  | 7000                                                                | 7000                                                                              |
| Electricity requirements [kWh/m <sup>3</sup> /a]                         | 0.26                                                                | 0.26                                                                              |
| Electricity requirements for irrigation [kWh/a]                          | 1820                                                                | 1820                                                                              |
| Peak power for PV system [kWp]                                           | 1.16                                                                | 3.53                                                                              |
| Efficiency of PV Module [%]                                              | 13.5                                                                | 13.5                                                                              |
| Required PV module area [m <sup>2</sup> ]                                | 8.5                                                                 | 26.0                                                                              |

## 4 References

1. Grain SA Operational planning of white maize grain production in the production year 2011/2012 in Eastern Highveld, South Africa; Lynnwood Ridge, South Africa, 2014;
2. Grain SA Operational planning of white maize grain production in the production year 2011/2012 in Northwest, South Africa; Lynnwood Ridge, South Africa, 2014;
3. Grain SA Operational planning of white maize grain production in the production year 2011/2012 in Central and Northern Free State, South Africa; Lynnwood Ridge, South Africa, 2014;
4. Coetzee, J. (South African Breweries, Johannesburg, South Africa) Personal communication 2016.
5. DistanceFromTo Available online: <http://www.distancefromto.net> (accessed on Apr 15, 2015).
6. SeaRates.com Available online: <http://www.searates.com/de/reference/portdistance> (accessed on Apr 15, 2015).
7. Hall, W. (Maize producer, South Africa) Personal communication 2015.
8. Rechtus, S. (GWK Beperk, South Africa) Personal communication 2016.
9. Meier, M. S.; Schader, C.; Berner, A.; Gattinger, A. Modelling N<sub>2</sub>O emissions from organic fertilisers for LCA inventories. 2012.
10. Prasuhn, V. Erfassung der PO<sub>4</sub>-Austräge für die Ökobilanzierung. SALCA-Phosphor; Agroscope FAL Reckenholz: Zurich, Switzerland, 2006;
11. Coetzee, J. (South A. B. (South African Breweries, Johannesburg, South Africa) Personal communication 2015.
12. Kooman, G.; Critchley, W. R. S. GIS-Assisted Modelling of Soil Erosion in a South African Catchment: Evaluating the USLE and SLEMSA Approach. In Water Resources Planning, Development and Management; Breetzke, G. D., Ed.; InTech, 2013 ISBN 978-953-51-1092-7.
13. Le Roux, J. J.; Morgenthal, T. L.; Malherbe, J.; Pretorius, D. J.; Sumner, P. D. Water erosion prediction at a national scale for South Africa. Water SA 2008, 34, 305–314.
14. UWC Erosion Available online: <http://www.botany.uwc.ac.za/envfacts/facts/erosion.htm> (accessed on Apr 28, 2015).
15. Wilke, B.; Schaub, D. Phosphatanreicherung bei Bodenerosion. Mitt Dtsch. Bodenkd. Gesellsch 1996, 435–438.
16. Wolfensberger, U.; Dinkel, F.; Gaillard, G.; Hirs, B.; Lips, A.; Nentwig, W.; Waldeck, B. Beurteilung nachwachsender Rohstoffe in der Schweiz in den Jahren 1993-1996. Vergleichende Betrachtung von Produkten aus ausgewählten NWR und entsprechenden konventionellen Produkten bezüglich Umweltwirkungen und Wirtschaftlichkeit; Bern/Tänikon, 1997;
17. Freiermuth, R. Modell zur Berechnung der Schwermetallflüsse in der landwirtschaftlichen Ökobilanz; 2006; pp. 1–42;.
18. Keller, T.; Desales, A. NABO: Böden der Schweiz: Schadstoffgehalte und Orientierungswerte (1990-1996); Bundesamt für Umwelt, Wald und Landschaft, 2001;
19. Pfister, S.; Baumann, J. Monthly characterization factors for water consumption and application to temporally explicit cereals inventory. In LCA food 2012: VII international conference on life assessment in the agri-food sector; Bari, Italy, 2010.
20. Grain SA Report Documents Available online: [http://www.grainsa.co.za/upload/report\\_files/NOK-Wit-geelmielies---white-and-yellow-maize-per-provinsie.xls](http://www.grainsa.co.za/upload/report_files/NOK-Wit-geelmielies---white-and-yellow-maize-per-provinsie.xls) (accessed on Apr 13, 2017).
21. DAFF Trends in the Agricultural Sector 2016; Department of Agriculture, Forestry and Fisheries (DAFF), Republic of South Africa: Pretoria, South Africa, 2017;
22. ecoinvent Centre ecoinvent data v3.3; Swiss Centre for Life Cycle Inventories: Zürich, 2016;
23. JRC-EC PV potential estimation utility Available online: <http://re.jrc.ec.europa.eu/pvgis/apps4/pvest.php?lang=en&map=africa> (accessed on Apr 25, 2015).

24. Frischknecht, R.; Heath, G.; Raugei, M.; Sinha, P.; de Wild-Scholten, M. Methodology Guidelines on Life Cycle Assessment of Photovoltaic Electricity: 3rd Edition; National Renewable Energy Laboratory (NREL): Golden, CO, United States, 2016;
25. Jungbluth, N.; Stucki, M.; Flury, K.; Frischknecht, R.; Büsser, S. Life cycle inventories of photovoltaics. ESU-Serv. Ltd Uster Switz. 2012.
